# Supplementary material
Source: Springer Nature journal article supplement (https://www.springermedizin.de/resource/supplementary/12905_2007_125_MOESM4_ESM.pdf/9519178)

**A**

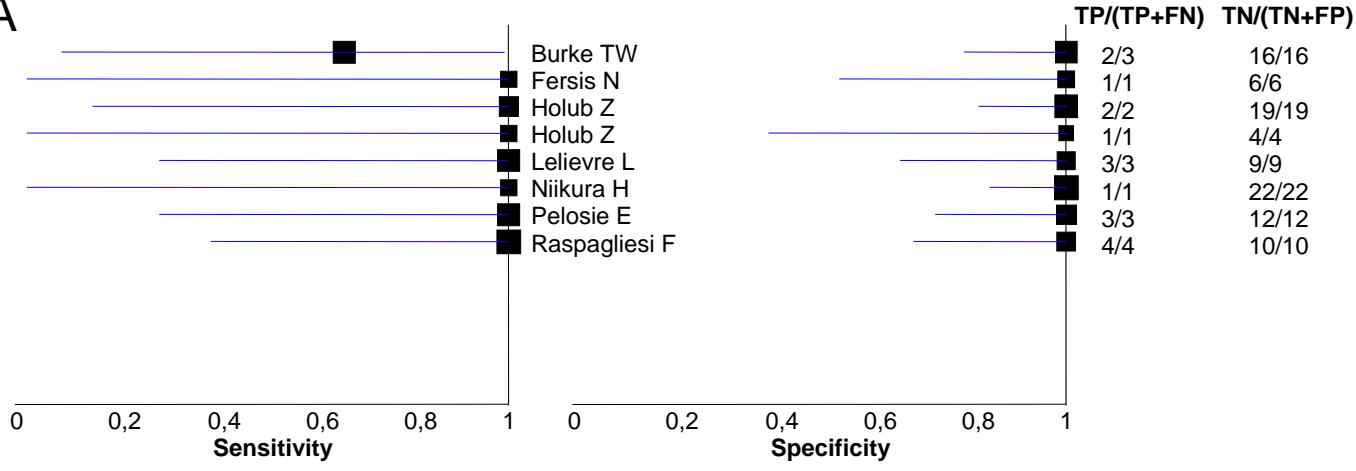

**B**

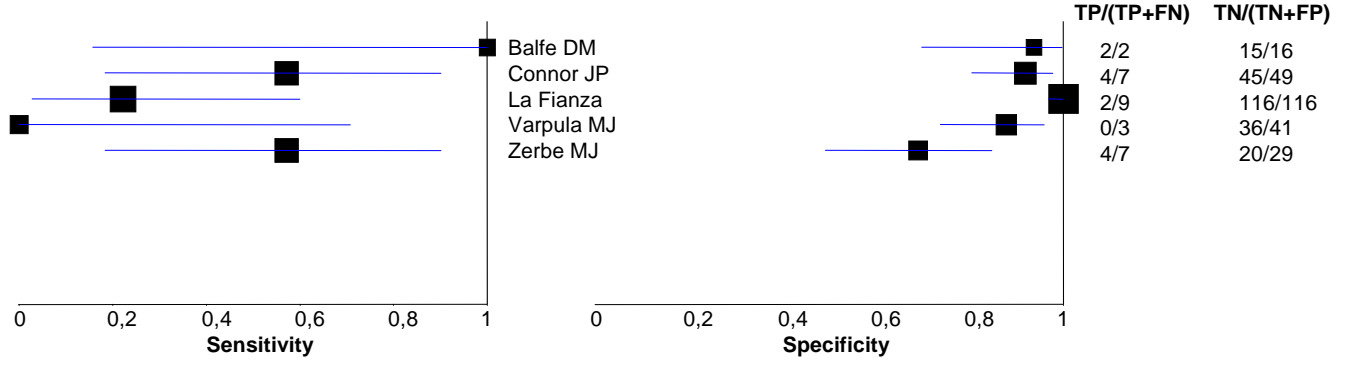

**C**

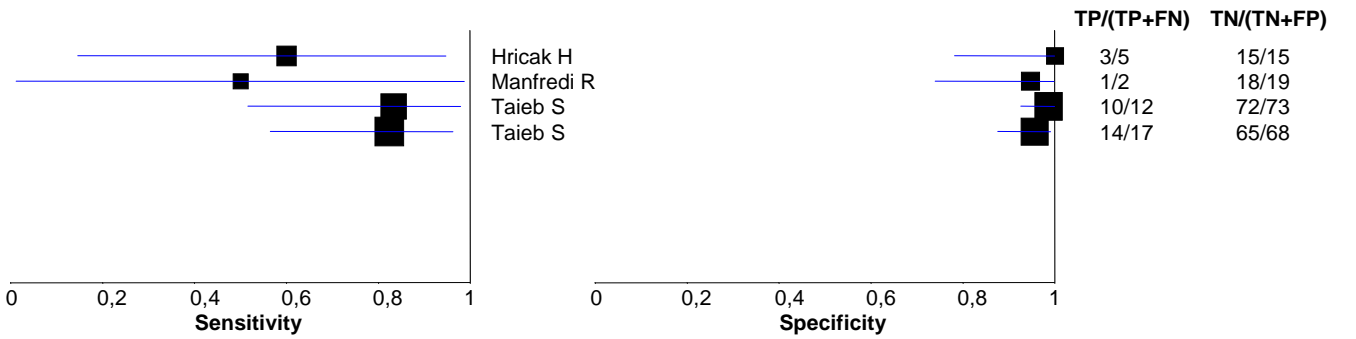

Supplement: MOESM4 [file 9519178]
